# Supplementary material
Source: PubMed Central journal article supplement (PMC4116743)

A)

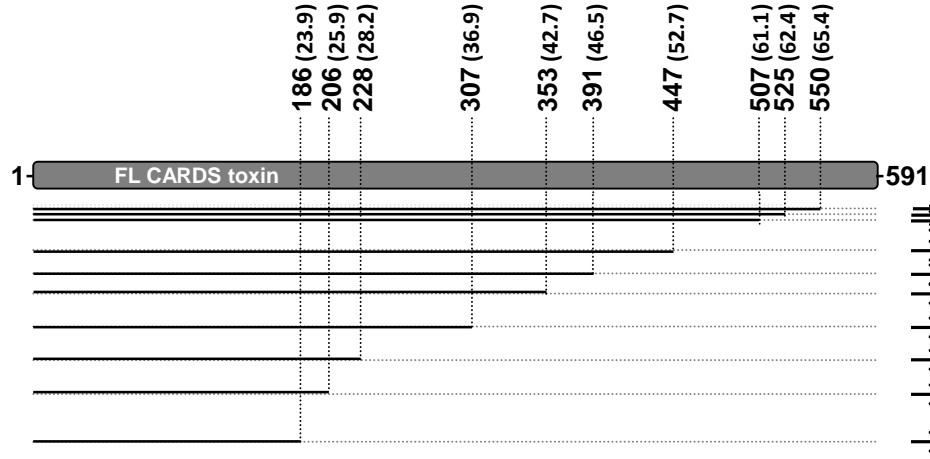

B)

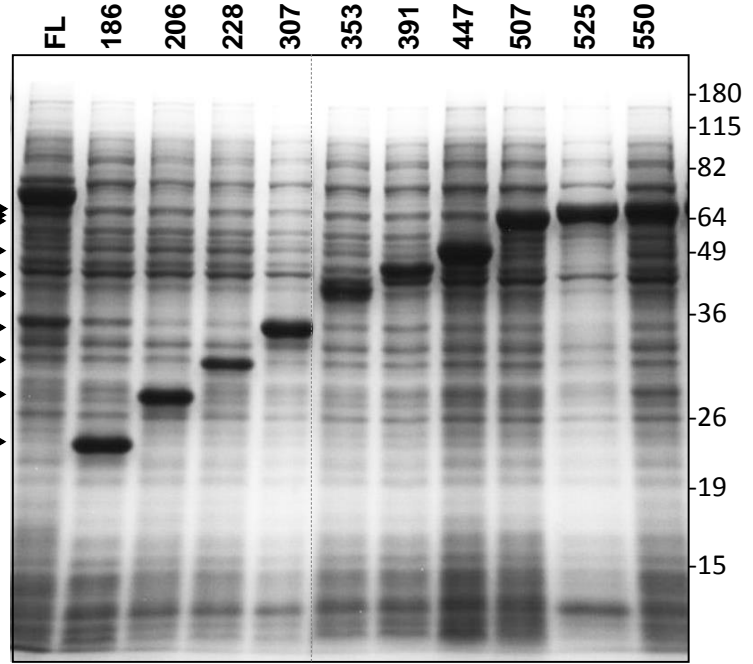

A)

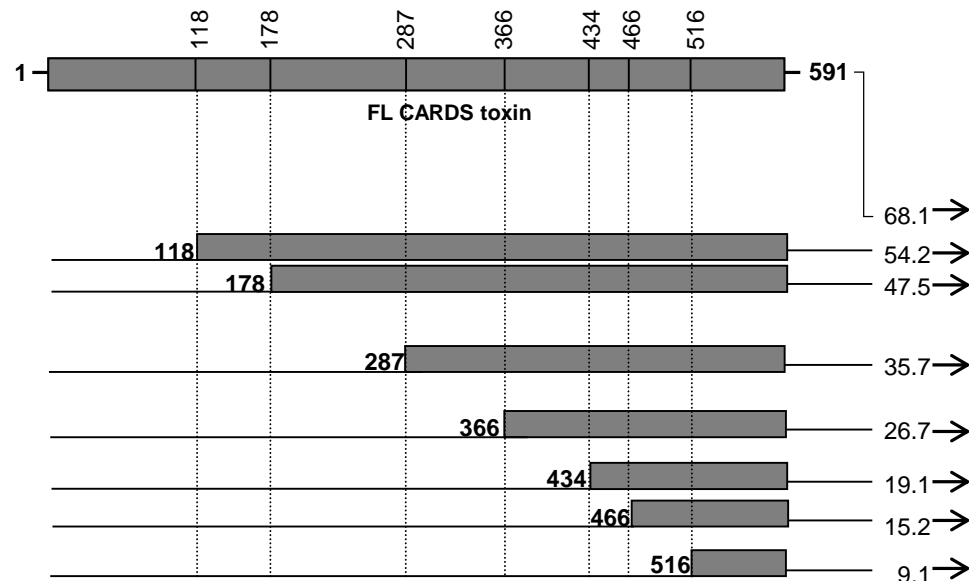

B)

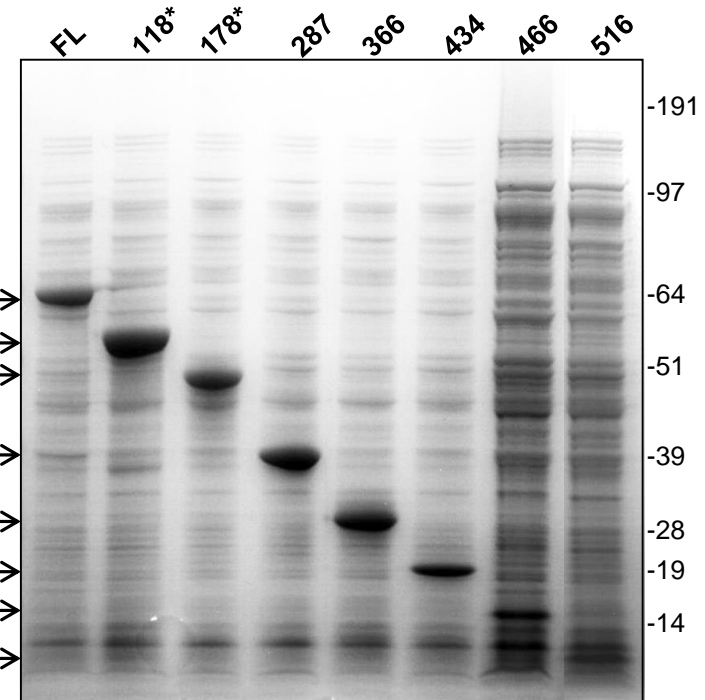

Supplement: NIHMS607234-supplement-Supp_FigureS1-S2.pdf [file NIHMS607234-supplement-Supp_FigureS1-S2.pdf]
